# Supplementary material for: Low Risk of Dementia in Patients With Newly Diagnosed Atrial Fibrillation and a Clustering of Healthy Lifestyle Behaviors: A Nationwide Population‐Based Cohort Study
Source: PubMed Central journal article supplement — J Am Heart Assoc. 2022 Mar 24;11(7):e023739. doi: 10.1161/JAHA.121.023739 (PMC9075438; doi:10.1161/jaha.121.023739), 2022-03-24
Supplement: JAH3-11-e023739-s001.pdf [file JAH3-11-e023739-s001.pdf]

# **SUPPLEMENTAL MATERIAL**

**Table S1. Definition of covariates and outcomes**

| <b>Diagnosis</b>                             | <b>ICD-10-CM code and definition</b>                                                                                                                                                                                                                                                                      | <b>Diagnostic definition</b>                                                     |
|----------------------------------------------|-----------------------------------------------------------------------------------------------------------------------------------------------------------------------------------------------------------------------------------------------------------------------------------------------------------|----------------------------------------------------------------------------------|
| <b>Inclusion/exclusion criteria</b>          |                                                                                                                                                                                                                                                                                                           |                                                                                  |
| <b>Atrial fibrillation</b>                   | I48.0-48.4, I48.9                                                                                                                                                                                                                                                                                         | Admission or outpatient department $\geq$ 1                                      |
| <b>Valvular atrial fibrillation</b>          | I05.0, I05.2, I05.9, Z95.2-Z95.4                                                                                                                                                                                                                                                                          | Admission or outpatient department $\geq$ 1                                      |
| <b>Comorbidities</b>                         |                                                                                                                                                                                                                                                                                                           |                                                                                  |
| <b>Hypertension</b>                          | I10-I13, I15; and minimum 1 prescription of anti-hypertensive drug (thiazide, loop diuretics, aldosterone antagonist, alpha-/beta-blocker, calcium-channel blocker, angiotensin-converting enzyme inhibitor, angiotensin II receptor blocker).<br>Or systolic/diastolic blood pressure $\geq$ 140/90 mmHg | Admission $\geq$ 1 or outpatient department $\geq$ 1<br>Index health examination |
| <b>Diabetes mellitus</b>                     | E11-E14; and minimum 1 prescription of anti-diabetic drugs (sulfonylureas, metformin, meglitinides, thiazolidinediones, dipeptidyl peptidase-4 inhibitors, $\alpha$ -glucosidase inhibitors, and insulin).<br>Or fasting glucose level $\geq$ 126 mg/dL                                                   | Admission $\geq$ 1 or outpatient department $\geq$ 1<br>Index health examination |
| <b>Dyslipidemia</b>                          | E78<br>Or Total cholesterol $\geq$ 240 mg/dL                                                                                                                                                                                                                                                              | Admission or outpatient department $\geq$ 1<br>Index health examination          |
| <b>Heart failure</b>                         | I50                                                                                                                                                                                                                                                                                                       | Admission or outpatient department $\geq$ 1                                      |
| <b>Prior stroke</b>                          | I63, I64                                                                                                                                                                                                                                                                                                  | Admission or outpatient department $\geq$ 1                                      |
| <b>Vascular disease</b>                      |                                                                                                                                                                                                                                                                                                           |                                                                                  |
| <b>Prior myocardial infarction</b>           | I21, I22                                                                                                                                                                                                                                                                                                  | Admission or outpatient department $\geq$ 1                                      |
| <b>Peripheral artery disease</b>             | I70, I73                                                                                                                                                                                                                                                                                                  | Admission or outpatient department $\geq$ 1                                      |
| <b>Chronic kidney disease</b>                | Estimated glomerular filtration rate $<$ 60 ml/min/1.73m <sup>2</sup>                                                                                                                                                                                                                                     | Index health examination                                                         |
| <b>Chronic obstructive pulmonary disease</b> | J41-44                                                                                                                                                                                                                                                                                                    | Admission or outpatient department $\geq$ 1                                      |
| <b>Cancer</b>                                | C00-97 and RID code (V193)                                                                                                                                                                                                                                                                                | Admission or outpatient department $\geq$ 1                                      |
| <b>Scores</b>                                |                                                                                                                                                                                                                                                                                                           |                                                                                  |

**CHA<sub>2</sub>DS<sub>2</sub>-VASc score**

Heart failure (1 point), hypertension (1 point), age  $\geq 75$  years (2 points), diabetes (1 point), previous stroke/systemic embolism/transient ischemic attack (2 points), vascular disease (prior MI or PAD, 1 point) and female sex (1 point)

---

ICD, international classification of disease; CM, clinical modification.

**Table S2. Cox analyses: hazard ratios for all dementia, Alzheimer’s dementia, and vascular dementia according to the combination of healthy lifestyle behavior**

| Healthy lifestyle behavior score | Number  | Event | IR (per 1,000 PY) | Unadjusted HR (95% CI) | Age- and sex-adjusted HR (95% CI) | Multivariable adjusted HR (95% CI) |
|----------------------------------|---------|-------|-------------------|------------------------|-----------------------------------|------------------------------------|
| <b>All dementia</b>              |         |       |                   |                        |                                   |                                    |
| 0                                | 8,709   | 327   | 9.99              | 1 (reference)          | 1 (reference)                     | 1 (reference)                      |
| 1                                | 34,839  | 1,425 | 11.01             | 1.103 (0.978-1.244)    | 0.729 (0.646-0.822)               | 0.753 (0.667-0.849)                |
| 2                                | 106,796 | 7,625 | 19.80             | 1.988 (1.779-2.220)    | 0.728 (0.650-0.816)               | 0.728 (0.650-0.815)                |
| 3                                | 49,608  | 2,444 | 13.52             | 1.356 (1.208-1.522)    | 0.611 (0.543-0.687)               | 0.622 (0.553-0.699)                |
| <b>p-value</b>                   |         |       |                   | <0.001                 | <0.001                            | <0.001                             |
| <b>Alzheimer’s dementia</b>      |         |       |                   |                        |                                   |                                    |
| 0                                | 8,709   | 207   | 6.33              | 1 (reference)          | 1 (reference)                     | 1 (reference)                      |
| 1                                | 34,839  | 1,020 | 7.88              | 1.247 (1.074-1.448)    | 0.802 (0.69-0.931)                | 0.83 (0.714-0.964)                 |
| 2                                | 106,796 | 5,687 | 14.77             | 2.344 (2.041-2.693)    | 0.804 (0.698-0.926)               | 0.808 (0.701-0.931)                |
| 3                                | 49,608  | 1,767 | 9.77              | 1.550 (1.342-1.709)    | 0.665 (0.574-0.769)               | 0.681 (0.588-0.788)                |
| <b>p-value</b>                   |         |       |                   | <0.001                 | <0.001                            | <0.001                             |
| <b>Vascular dementia</b>         |         |       |                   |                        |                                   |                                    |
| 0                                | 8,709   | 88    | 2.69              | 1 (reference)          | 1 (reference)                     | 1 (reference)                      |
| 1                                | 34,839  | 238   | 1.84              | 0.685 (0.536-0.874)    | 0.499 (0.391-0.638)               | 0.510 (0.399-0.651)                |
| 2                                | 106,796 | 1,105 | 2.87              | 1.069 (0.861-1.328)    | 0.497 (0.396-0.622)               | 0.480 (0.383-0.601)                |
| 3                                | 49,608  | 410   | 2.27              | 0.845 (0.671-1.063)    | 0.454 (0.359-0.575)               | 0.446 (0.352-0.565)                |
| <b>p-value</b>                   |         |       |                   | <0.001                 | <0.001                            | <0.001                             |

Multivariable adjusted model included age, sex, hypertension, diabetes mellitus, dyslipidemia, heart failure, prior ischemic stroke, prior myocardial infarction, peripheral artery disease, chronic obstructive pulmonary disease, cancer, chronic kidney disease, CHA<sub>2</sub>DS<sub>2</sub>-VASc score, use of oral anticoagulant, antiplatelet agent, and statin, BMI, and low income.

CI, confidence interval; HR, hazard ratio; IR, incidence rate; PY, person-years.

**Table S3. Sensitivity analyses: the association between HLS score and the risk of dementia according to smoking status (non-current smokers and current smokers)**

| <b>Outcome</b>                   | <b>HLS</b> | <b>Number</b> | <b>Events</b> | <b>IR</b> | <b>Adjusted HR (95% CI)</b> | <b>p-value</b> |
|----------------------------------|------------|---------------|---------------|-----------|-----------------------------|----------------|
| <b>Excluding current smokers</b> |            |               |               |           |                             |                |
| <b>Dementia</b>                  | 0          | 18,811        | 847           | 12.27     | 1 (reference)               | <0.001         |
|                                  | 1          | 102,509       | 7,475         | 20.25     | 1.030 (0.957-1.109)         |                |
|                                  | 2          | 49,608        | 2,444         | 13.52     | 0.880 (0.812-0.953)         |                |
| <b>Among current smokers</b>     |            |               |               |           |                             |                |
| <b>Dementia</b>                  | 0          | 8,709         | 3,27          | 9.99      | 1 (reference)               | 0.007          |
|                                  | 1          | 16,028        | 5,78          | 9.58      | 0.826 (0.719-0.947)         |                |
|                                  | 2          | 4,287         | 1,50          | 9.35      | 0.769 (0.633-0.935)         |                |

IR, per 1,000 person-years

CI, confidence interval; HLS, healthy lifestyle behavior score; HR, hazard ratio; IR, incidence rate.

**Table S4. Rhythm control treatment in different HLS score groups**

|                       | <b>Total<br/>(n=199,952)</b> | <b>HLS 0<br/>(n=8709)</b> | <b>HLS 1<br/>(n=34839)</b> | <b>HLS 2<br/>(n=106796)</b> | <b>HLS 3<br/>(n=49608)</b> | <b>p-value</b> |
|-----------------------|------------------------------|---------------------------|----------------------------|-----------------------------|----------------------------|----------------|
| <b>Rhythm control</b> | 50,293<br>(25.1%)            | 1,916<br>(22%)            | 8,251<br>(23.7%)           | 26,421<br>(24.7%)           | 13,705<br>(27.6%)          | <0.001         |
| <b>AAD</b>            | 49,473<br>(24.7%)            | 1,866<br>(21.4%)          | 8,073<br>(23.2%)           | 26,028<br>(24.4%)           | 13,506<br>(27.2%)          | <0.001         |
| <b>DCC</b>            | 6,067<br>(3.0%)              | 267<br>(3.1%)             | 1,073<br>(3.1%)            | 3,011<br>(2.8%)             | 1,716<br>(3.5%)            | <0.001         |
| <b>RFCA</b>           | 1,917<br>(1.0%)              | 44<br>(0.5%)              | 256<br>(0.7%)              | 925<br>(0.9%)               | 692<br>(1.4%)              | <0.001         |

AAD, antiarrhythmic drug; DCC, direct current cardioversion; HLS, healthy lifestyle score; RFCA, radiofrequency catheter ablation.

**Table S5. Sensitivity analysis: additionally adjusted rhythm control treatment**

|                             | <b>Final model<br/>HR (95% CI)</b> | <b>Additionally adjusted rhythm<br/>control treatment<br/>HR (95% CI)</b> |
|-----------------------------|------------------------------------|---------------------------------------------------------------------------|
| <b>Dementia</b>             |                                    |                                                                           |
| <b>HLS 0</b>                | 1 (reference)                      | 1 (reference)                                                             |
| <b>HLS 1</b>                | 0.753 (0.667-0.849)                | 0.756 (0.67-0.853)                                                        |
| <b>HLS 2</b>                | 0.728 (0.65-0.815)                 | 0.733 (0.655-0.822)                                                       |
| <b>HLS 3</b>                | 0.622 (0.553-0.699)                | 0.629 (0.559-0.707)                                                       |
| <b>p-value</b>              | <0.001                             | <0.001                                                                    |
| <b>Alzheimer's dementia</b> |                                    |                                                                           |
| <b>HLS 0</b>                | 1 (reference)                      | 1 (reference)                                                             |
| <b>HLS 1</b>                | 0.830 (0.714-0.964)                | 0.832 (0.716-0.967)                                                       |
| <b>HLS 2</b>                | 0.808 (0.701-0.931)                | 0.813 (0.705-0.937)                                                       |
| <b>HLS 3</b>                | 0.681 (0.588-0.788)                | 0.686 (0.593-0.795)                                                       |
| <b>p-value</b>              | <0.001                             | <0.001                                                                    |
| <b>Vascular dementia</b>    |                                    |                                                                           |
| <b>HLS 0</b>                | 1 (reference)                      | 1 (reference)                                                             |
| <b>HLS 1</b>                | 0.510 (0.399-0.651)                | 0.512 (0.401-0.655)                                                       |
| <b>HLS 2</b>                | 0.480 (0.383-0.601)                | 0.485 (0.387-0.608)                                                       |
| <b>HLS 3</b>                | 0.446 (0.352-0.565)                | 0.453 (0.358-0.575)                                                       |
| <b>p-value</b>              | <0.001                             | <0.001                                                                    |

CI, confidence interval; HLS, healthy lifestyle behavior score; HR, hazard ratio.

**Table S6. Subgroup analyses for Alzheimer’s dementia**

| Subgroup                                        | HLS      | Number | Events | IR    | Adjusted HR<br>(95% CI) | p-value | p-for-<br>interaction |
|-------------------------------------------------|----------|--------|--------|-------|-------------------------|---------|-----------------------|
| <b>Age (years)</b>                              |          |        |        |       |                         |         |                       |
| <b>&lt;65</b>                                   | <b>0</b> | 6,515  | 48     | 1.91  | 1 (reference)           | <0.001  |                       |
|                                                 | <b>1</b> | 22,040 | 128    | 1.50  | 0.697 (0.500-0.972)     |         |                       |
|                                                 | <b>2</b> | 48,275 | 400    | 2.10  | 0.675 (0.495-0.920)     |         |                       |
|                                                 | <b>3</b> | 24,539 | 162    | 1.68  | 0.519 (0.371-0.726)     |         |                       |
| <b>65 to &lt;75</b>                             | <b>0</b> | 1,658  | 91     | 15.07 | 1 (reference)           | <0.001  | 0.751                 |
|                                                 | <b>1</b> | 8,860  | 428    | 13.32 | 0.835 (0.666-1.048)     |         |                       |
|                                                 | <b>2</b> | 34,956 | 2,051  | 16.08 | 0.799 (0.645-0.990)     |         |                       |
|                                                 | <b>3</b> | 17,180 | 765    | 12.38 | 0.660 (0.529-0.824)     |         |                       |
| <b>≥75</b>                                      | <b>0</b> | 536    | 68     | 43.42 | 1 (reference)           | <0.001  |                       |
|                                                 | <b>1</b> | 3,939  | 464    | 39.59 | 0.874 (0.677-1.128)     |         |                       |
|                                                 | <b>2</b> | 23,565 | 3,236  | 48.40 | 0.867 (0.680-1.106)     |         |                       |
|                                                 | <b>3</b> | 7,889  | 840    | 37.06 | 0.732 (0.570-0.939)     |         |                       |
| <b>Sex</b>                                      |          |        |        |       |                         |         |                       |
| <b>Men</b>                                      | <b>0</b> | 8,249  | 191    | 6.14  | 1 (reference)           | <0.001  | 0.380                 |
|                                                 | <b>1</b> | 29,994 | 830    | 7.46  | 0.835 (0.713-0.977)     |         |                       |
|                                                 | <b>2</b> | 57,185 | 2,149  | 10.52 | 0.826 (0.711-0.959)     |         |                       |
|                                                 | <b>3</b> | 24,989 | 736    | 8.32  | 0.695 (0.592-0.816)     |         |                       |
| <b>Women</b>                                    | <b>0</b> | 460    | 16     | 10.01 | 1 (reference)           | <0.001  |                       |
|                                                 | <b>1</b> | 4,845  | 190    | 10.51 | 0.656 (0.393-1.093)     |         |                       |
|                                                 | <b>2</b> | 49,611 | 3,538  | 19.56 | 0.598 (0.366-0.978)     |         |                       |
|                                                 | <b>3</b> | 24,619 | 1,031  | 11.16 | 0.501 (0.305-0.821)     |         |                       |
| <b>CHA<sub>2</sub>DS<sub>2</sub>-VASc score</b> |          |        |        |       |                         |         |                       |
| <b>Men&lt;2 and<br/>women &lt;3</b>             | <b>0</b> | 3,268  | 15     | 1.12  | 1 (reference)           | 0.093   | 0.484                 |
|                                                 | <b>1</b> | 11,581 | 38     | 0.80  | 0.558 (0.306-1.016)     |         |                       |
|                                                 | <b>2</b> | 24,679 | 145    | 1.42  | 0.676 (0.390-1.172)     |         |                       |
|                                                 | <b>3</b> | 12,749 | 62     | 1.18  | 0.525 (0.292-0.944)     |         |                       |



|                                                           |          |        |       |       |                     |        |       |
|-----------------------------------------------------------|----------|--------|-------|-------|---------------------|--------|-------|
| <b>Men<math>\geq</math>2 and women <math>\geq</math>3</b> | <b>0</b> | 5,441  | 192   | 9.94  | 1 (reference)       | <0.001 |       |
|                                                           | <b>1</b> | 23,258 | 982   | 12.00 | 0.850 (0.728-0.992) |        |       |
|                                                           | <b>2</b> | 82,117 | 5,542 | 19.60 | 0.821 (0.708-0.951) |        |       |
|                                                           | <b>3</b> | 36,859 | 1,705 | 13.27 | 0.689 (0.592-0.802) |        |       |
| <b>Prior ischemic stroke</b>                              |          |        |       |       |                     |        |       |
| <b>No</b>                                                 | <b>0</b> | 7,361  | 129   | 4.60  | 1 (reference)       | <0.001 |       |
|                                                           | <b>1</b> | 28,359 | 626   | 5.82  | 0.792 (0.654-0.957) |        |       |
|                                                           | <b>2</b> | 79,163 | 3,122 | 10.60 | 0.727 (0.606-0.871) |        |       |
|                                                           | <b>3</b> | 37,320 | 992   | 7.12  | 0.617 (0.511-0.744) |        |       |
| <b>Yes</b>                                                | <b>0</b> | 1,348  | 78    | 16.7  | 1 (reference)       | <0.001 | 0.664 |
|                                                           | <b>1</b> | 6,480  | 394   | 17.96 | 0.860 (0.674-1.097) |        |       |
|                                                           | <b>2</b> | 27,633 | 2,565 | 28.3  | 0.908 (0.722-1.142) |        |       |
|                                                           | <b>3</b> | 12,288 | 775   | 18.64 | 0.751 (0.593-0.951) |        |       |
| <b>OAC</b>                                                |          |        |       |       |                     |        |       |
| <b>No</b>                                                 | <b>0</b> | 6,932  | 166   | 6.16  | 1 (reference)       | <0.001 |       |
|                                                           | <b>1</b> | 26,877 | 775   | 7.43  | 0.810 (0.685-0.959) |        |       |
|                                                           | <b>2</b> | 77,822 | 4,155 | 13.96 | 0.772 (0.659-0.906) |        |       |
|                                                           | <b>3</b> | 35,812 | 1,279 | 9.24  | 0.654 (0.555-0.772) |        |       |
| <b>Yes</b>                                                | <b>0</b> | 1,777  | 41    | 7.10  | 1 (reference)       | 0.004  | 0.652 |
|                                                           | <b>1</b> | 7,962  | 245   | 9.74  | 0.919 (0.660-1.280) |        |       |
|                                                           | <b>2</b> | 28,974 | 1,532 | 17.52 | 0.953 (0.696-1.306) |        |       |
|                                                           | <b>3</b> | 13,796 | 488   | 11.49 | 0.791 (0.573-1.092) |        |       |

IR, per 1,000 person-years.

Adjusted for age, sex, hypertension, diabetes mellitus, dyslipidemia, heart failure, prior ischemic stroke, prior myocardial infarction, peripheral artery disease, chronic obstructive pulmonary disease, cancer, chronic kidney disease, CHA<sub>2</sub>DS<sub>2</sub>-VASc score, use of oral anticoagulant, antiplatelet agent, and statin, BMI, and low income.

CI, confidence interval; HLS, healthy lifestyle behavior score; HR, hazard ratio; IR, incidence rate; OAC, oral anticoagulant.

**Table S7. Subgroup analyses for Vascular dementia**

| Subgroup                                        | HLS      | Number | Events | IR    | Adjusted HR<br>(95% CI) | p-value | p-for-<br>interaction |
|-------------------------------------------------|----------|--------|--------|-------|-------------------------|---------|-----------------------|
| <b>Age (years)</b>                              |          |        |        |       |                         |         |                       |
| <b>&lt;65</b>                                   | <b>0</b> | 6,515  | 35     | 1.39  | 1 (reference)           | <0.001  |                       |
|                                                 | <b>1</b> | 22,040 | 68     | 0.79  | 0.526 (0.350-0.792)     |         |                       |
|                                                 | <b>2</b> | 48,275 | 152    | 0.80  | 0.431 (0.294-0.631)     |         |                       |
|                                                 | <b>3</b> | 24,539 | 65     | 0.67  | 0.354 (0.231-0.544)     |         |                       |
| <b>65 to &lt;75</b>                             | <b>0</b> | 1,658  | 34     | 5.63  | 1 (reference)           | 0.002   | 0.528                 |
|                                                 | <b>1</b> | 8,860  | 104    | 3.24  | 0.552 (0.374-0.813)     |         |                       |
|                                                 | <b>2</b> | 34,956 | 458    | 3.59  | 0.517 (0.361-0.740)     |         |                       |
|                                                 | <b>3</b> | 17,180 | 202    | 3.27  | 0.496 (0.342-0.721)     |         |                       |
| <b>≥75</b>                                      | <b>0</b> | 536    | 19     | 12.13 | 1 (reference)           | 0.015   |                       |
|                                                 | <b>1</b> | 3,939  | 66     | 5.63  | 0.464 (0.278-0.773)     |         |                       |
|                                                 | <b>2</b> | 23,565 | 495    | 7.40  | 0.494 (0.309-0.790)     |         |                       |
|                                                 | <b>3</b> | 7,889  | 143    | 6.31  | 0.456 (0.281-0.742)     |         |                       |
| <b>Sex</b>                                      |          |        |        |       |                         |         |                       |
| <b>Men</b>                                      | <b>0</b> | 8,249  | 83     | 2.67  | 1 (reference)           | <0.001  |                       |
|                                                 | <b>1</b> | 29,994 | 197    | 1.77  | 0.508 (0.392-0.657)     |         |                       |
|                                                 | <b>2</b> | 57,185 | 469    | 2.30  | 0.491 (0.387-0.623)     |         |                       |
|                                                 | <b>3</b> | 24,989 | 194    | 2.19  | 0.474 (0.365-0.615)     |         |                       |
| <b>Women</b>                                    | <b>0</b> | 460    | 5      | 3.13  | 1 (reference)           | 0.046   | 0.665                 |
|                                                 | <b>1</b> | 4,845  | 41     | 2.27  | 0.473 (0.187-1.198)     |         |                       |
|                                                 | <b>2</b> | 49,611 | 636    | 3.52  | 0.384 (0.159-0.929)     |         |                       |
|                                                 | <b>3</b> | 24,619 | 216    | 2.34  | 0.351 (0.144-0.854)     |         |                       |
| <b>CHA<sub>2</sub>DS<sub>2</sub>-VASc score</b> |          |        |        |       |                         |         |                       |
| <b>Men&lt;2 and<br/>women &lt;3</b>             | <b>0</b> | 3,268  | 11     | 0.82  | 1 (reference)           | 0.063   | 0.722                 |
|                                                 | <b>1</b> | 11,581 | 21     | 0.44  | 0.479 (0.230-0.995)     |         |                       |
|                                                 | <b>2</b> | 24,679 | 54     | 0.53  | 0.474 (0.242-0.931)     |         |                       |
|                                                 | <b>3</b> | 12,749 | 21     | 0.40  | 0.352 (0.164-0.756)     |         |                       |

|                              |          |        |       |      |                     |        |       |
|------------------------------|----------|--------|-------|------|---------------------|--------|-------|
| <b>Men≥2 and women ≥3</b>    | <b>0</b> | 5,441  | 77    | 3.99 | 1 (reference)       | <0.001 | 0.340 |
|                              | <b>1</b> | 23,258 | 217   | 2.65 | 0.519 (0.400-0.673) |        |       |
|                              | <b>2</b> | 82,117 | 1,051 | 3.72 | 0.487 (0.383-0.619) |        |       |
|                              | <b>3</b> | 36,859 | 389   | 3.03 | 0.457 (0.356-0.588) |        |       |
| <b>Prior ischemic stroke</b> |          |        |       |      |                     |        |       |
| <b>No</b>                    | <b>0</b> | 7,361  | 47    | 1.68 | 1 (reference)       | <0.001 | 0.340 |
|                              | <b>1</b> | 28,359 | 123   | 1.14 | 0.495 (0.353-0.694) |        |       |
|                              | <b>2</b> | 79,163 | 532   | 1.81 | 0.475 (0.348-0.649) |        |       |
|                              | <b>3</b> | 37,320 | 194   | 1.39 | 0.425 (0.305-0.591) |        |       |
| <b>Yes</b>                   | <b>0</b> | 1,348  | 41    | 8.78 | 1 (reference)       | <0.001 | 0.340 |
|                              | <b>1</b> | 6,480  | 115   | 5.24 | 0.519 (0.363-0.742) |        |       |
|                              | <b>2</b> | 27,633 | 573   | 6.32 | 0.476 (0.343-0.661) |        |       |
|                              | <b>3</b> | 12,288 | 216   | 5.2  | 0.453 (0.322-0.638) |        |       |
| <b>OAC</b>                   |          |        |       |      |                     |        |       |
| <b>No</b>                    | <b>0</b> | 6,932  | 70    | 2.60 | 1 (reference)       | <0.001 | 0.460 |
|                              | <b>1</b> | 26,877 | 174   | 1.67 | 0.480 (0.363-0.634) |        |       |
|                              | <b>2</b> | 77,822 | 749   | 2.52 | 0.422 (0.327-0.546) |        |       |
|                              | <b>3</b> | 35,812 | 274   | 1.98 | 0.398 (0.303-0.522) |        |       |
| <b>Yes</b>                   | <b>0</b> | 1,777  | 18    | 3.12 | 1 (reference)       | 0.263  | 0.460 |
|                              | <b>1</b> | 7,962  | 64    | 2.54 | 0.637 (0.377-1.076) |        |       |
|                              | <b>2</b> | 28,974 | 356   | 4.07 | 0.691 (0.426-1.122) |        |       |
|                              | <b>3</b> | 13,796 | 136   | 3.20 | 0.625 (0.379-1.029) |        |       |

IR, per 1,000 person-years.

Adjusted for age, sex, hypertension, diabetes mellitus, dyslipidemia, heart failure, prior ischemic stroke, prior myocardial infarction, peripheral artery disease, chronic obstructive pulmonary disease, cancer, chronic kidney disease, CHA<sub>2</sub>DS<sub>2</sub>-VAsc score, use of oral anticoagulant, antiplatelet agent, and statin, BMI, and low income.

CI, confidence interval; HLS, healthy lifestyle behavior score; HR, hazard ratio; IR, incidence rate; OAC, oral anticoagulant.

**Table S8. Exploratory analyses: the risk of dementia between HLS 1 and HLS 2 or 3**

| <b>Outcomes</b>     | <b>HLS</b> | <b>Number</b> | <b>Events</b> | <b>IR</b> | <b>Adjusted HR (95% CI)</b> | <b>p-value</b> |
|---------------------|------------|---------------|---------------|-----------|-----------------------------|----------------|
| <b>All dementia</b> | 1          | 34,839        | 1,425         | 11.01     | 1 (reference)               | 0.010          |
|                     | 2,3        | 156,404       | 10,069        | 17.79     | 0.926 (0.874-0.982)         |                |

IR, per 1,000 person-years

CI, confidence interval; HLS, healthy lifestyle behavior score; HR, hazard ratio; IR, incidence rate.

**Table S9. Exploratory analyses: the risk of dementia between HLS 1, 2 and 3**

| <b>Outcomes</b>     | <b>HLS</b> | <b>Number</b> | <b>Events</b> | <b>IR</b> | <b>Adjusted HR<br/>(95% CI)</b> | <b>p-value</b> | <b>p-for-trend</b> |
|---------------------|------------|---------------|---------------|-----------|---------------------------------|----------------|--------------------|
| <b>All dementia</b> | 1          | 34,839        | 1,425         | 11.01     | 1 (reference)                   | <0.001         | <0.001             |
|                     | 2          | 106,796       | 7,625         | 19.80     | 0.968 (0.912-1.027)             |                |                    |
|                     | 3          | 49,608        | 2,444         | 13.52     | 0.826 (0.773-0.884)             |                |                    |

IR, per 1,000 person-years

CI, confidence interval; HLS, healthy lifestyle behavior score; HR, hazard ratio; IR, incidence rate.

**Table S10. The association between exercise amount/intensity and the risk of dementia**

| <b>Exercise intensity/dose</b>                              | <b>Number</b> | <b>Events</b> | <b>IR</b> | <b>Adjusted HR (95% CI)</b> |
|-------------------------------------------------------------|---------------|---------------|-----------|-----------------------------|
| <b>[MPA or VPA per 3-7 d/week]</b>                          |               |               |           |                             |
| Non-exerciser                                               | 147,417       | 9,845         | 18.42     | 1 (reference)               |
| MPA, 3-7 d/week                                             | 19,039        | 796           | 11.54     | 0.810 (0.754-0.871)         |
| VPA, 3-7 d/week                                             | 33,496        | 1,180         | 9.47      | 0.781 (0.735-0.831)         |
| <b>p-value</b>                                              |               |               |           | <0.001                      |
| <b>[MPA or VPA per 5-7 d/week]</b>                          |               |               |           |                             |
| Non-exerciser                                               | 175,382       | 10,780        | 16.90     | 1 (reference)               |
| Moderate intensity exercise, 5-7 d/week                     | 9,688         | 443           | 12.69     | 0.848 (0.771-0.933)         |
| Vigorous intensity exercise, 5-7 d/week                     | 14,882        | 598           | 10.80     | 0.796 (0.733-0.865)         |
| <b>p-value</b>                                              |               |               |           | <0.001                      |
| <b>[Exercise doses stratified by the frequency of MVPA]</b> |               |               |           |                             |
| Non-exerciser                                               | 108,380       | 8,416         | 21.65     | 1 (reference)               |
| MVPA 1-2/week                                               | 39,037        | 1,429         | 9.80      | 0.832 (0.786-0.880)         |
| MVPA 3-4/week                                               | 27,965        | 935           | 9.05      | 0.763 (0.713-0.818)         |
| MVPA 5-6/week                                               | 14,764        | 533           | 9.86      | 0.754 (0.691-0.824)         |
| MVPA ≥7/week                                                | 9,806         | 508           | 14.04     | 0.785 (0.717-0.859)         |
| <b>p-value</b>                                              |               |               |           | <0.001                      |
| <b>[Exercise doses stratified by MET-min/week]</b>          |               |               |           |                             |
| Non-exerciser                                               | 53,173        | 4,643         | 24.05     | 1 (reference)               |
| 0 to <500 MET-min/week                                      | 55,144        | 3,055         | 15.13     | 0.869 (0.830-0.910)         |

|                               |        |       |       |                     |
|-------------------------------|--------|-------|-------|---------------------|
| <b>500-999 MET-min/week</b>   | 55,494 | 2,784 | 13.85 | 0.840 (0.801-0.881) |
| <b>1000-1499 MET-min/week</b> | 22,651 | 819   | 9.91  | 0.739 (0.686-0.797) |
| <b>≥1500 MET-min/week</b>     | 13,490 | 520   | 10.55 | 0.720 (0.656-0.789) |
| <b>p-value</b>                |        |       |       | <0.001              |

---

IR, per 1,000 person-years

CI, confidence interval; d, day; HR, hazard ratio; IR, incidence rate; MPA, moderate-intensity physical activity; MVPA, moderate to vigorous physical activity; MET, metabolic equivalent task; VPA, vigorous-intensity physical activity.

**Table S11. Univariable and multivariable HRs for the risk of dementia**

| <b>Variable</b>                           | <b>Unadjusted HR<br/>(95% CI)</b> | <b>p-value</b> | <b>Adjusted HR<br/>(95% CI)</b> | <b>p-value</b> |
|-------------------------------------------|-----------------------------------|----------------|---------------------------------|----------------|
| <b>Age (years)</b>                        | 1.128 (1.125-1.130)               | <0.001         | 1.106 (1.103-1.110)             | <0.001         |
| <b>Male</b>                               | 1.714 (1.654-1.778)               | <0.001         | 1.199 (1.132-1.269)             | <0.001         |
| <b>BMI (kg/m<sup>2</sup>)</b>             | 0.928 (0.923-0.934)               | <0.001         | 0.968 (0.963-0.974)             | <0.001         |
| <b>CHA<sub>2</sub>DS<sub>2</sub>-VASc</b> | 1.621 (1.606-1.635)               | <0.001         | 1.077 (1.041-1.114)             | <0.001         |
| <b>SBP (mmHg)</b>                         |                                   | <0.001         |                                 | 0.671          |
| <b>&lt;120</b>                            | 1 (reference)                     |                | 1 (reference)                   |                |
| <b>120 to &lt;130</b>                     | 1.102 (1.047-1.161)               |                | 0.974 (0.925-1.026)             |                |
| <b>130 to &lt;140</b>                     | 1.256 (1.195-1.319)               |                | 0.975 (0.927-1.025)             |                |
| <b>≥140</b>                               | 1.605 (1.526-1.689)               |                | 0.973 (0.923-1.025)             |                |
| <b>Diabetes</b>                           | 1.545 (1.485-1.607)               | <0.001         | 1.152 (1.093-1.215)             | <0.001         |
| <b>Dyslipidemia</b>                       | 1.204 (1.161-1.248)               | <0.001         | 0.982 (0.942-1.024)             | 0.399          |
| <b>Heart failure</b>                      | 2.027 (1.954-2.103)               | <0.001         | 1.061 (1.007-1.117)             | 0.026          |
| <b>Prior MI</b>                           | 1.479 (1.406-1.556)               | <0.001         | 1.034 (0.977-1.094)             | 0.243          |
| <b>Prior stroke</b>                       | 2.998 (2.892-3.109)               | <0.001         | 1.509 (1.401-1.627)             | <0.001         |
| <b>PAD</b>                                | 1.703 (1.637-1.771)               | <0.001         | 1.064 (1.012-1.119)             | 0.015          |
| <b>COPD</b>                               | 1.767 (1.699-1.839)               | <0.001         | 1.113 (1.069-1.159)             | <0.001         |
| <b>Cancer</b>                             | 0.932 (0.860-1.011)               | 0.091          | 0.918 (0.846-0.997)             | 0.041          |
| <b>CKD</b>                                | 2.470 (2.376-2.568)               | <0.001         | 1.140 (1.095-1.186)             | <0.001         |
| <b>Low income</b>                         | 1.088 (1.038-1.139)               | 0.004          | 1.135 (1.084-1.190)             | <0.001         |
| <b>OAC</b>                                | 1.339 (1.286-1.395)               | <0.001         | 1.029 (0.987-1.074)             | 0.181          |
| <b>Antiplatelet</b>                       | 1.353 (1.303-1.406)               | <0.001         | 1.028 (0.987-1.072)             | 0.183          |
| <b>Statin</b>                             | 1.240 (1.185-1.298)               | <0.001         | 0.973 (0.921-1.027)             | 0.313          |
| <b>Smoking</b>                            |                                   | <0.001         |                                 | <0.001         |
| <b>non</b>                                | 1 (reference)                     |                | 1 (reference)                   |                |
| <b>ex-smoker</b>                          | 0.603 (0.575-0.632)               |                | 0.969 (0.916-1.024)             |                |
| <b>current smoker</b>                     | 0.489 (0.459-0.521)               |                | 1.237 (1.153-1.329)             |                |
| <b>Alcohol</b>                            |                                   | <0.001         |                                 | <0.001         |
| <b>non</b>                                | 1 (reference)                     |                | 1 (reference)                   |                |



|                   |                     |        |                     |        |
|-------------------|---------------------|--------|---------------------|--------|
| <b>mild</b>       | 0.396 (0.378-0.416) |        | 0.876 (0.830-0.925) |        |
| <b>moderate</b>   | 0.566 (0.393-0.815) |        | 1.196 (0.829-1.724) |        |
| <b>heavy</b>      | 0.745 (0.240-2.309) |        | 1.760 (0.567-5.462) |        |
| <b>Exercise</b>   |                     | <0.001 |                     | <0.001 |
| <b>non</b>        | 1 (reference)       |        | 1 (reference)       |        |
| <b>regular PA</b> | 0.573 (0.543-0.604) |        | 0.805 (0.763-0.849) |        |

---

BMI, body mass index; CI, confidence interval; CKD, chronic kidney disease; COPD, chronic obstructive pulmonary disease; HR, hazard ratio; MI, myocardial infarction; OAC, oral anticoagulant; PA, physical activity; PAD, peripheral artery disease; SBP, systolic blood pressure.

**Table S12. Baseline characteristics of patients with and without the national health examinations within 2-year**

|                      | <b>Total<br/>(n=576,077)</b> | <b>Patients receiving<br/>health examinations<br/>within 2-year after AF<br/>diagnosis<br/>(n=209,880)</b> | <b>Patients not receiving<br/>health examinations<br/>within 2-year after AF<br/>diagnosis<br/>(n=366,197)</b> | <b>p-value</b> |
|----------------------|------------------------------|------------------------------------------------------------------------------------------------------------|----------------------------------------------------------------------------------------------------------------|----------------|
| <b>Age, years</b>    | 66.82±15.6                   | 63.73±12.7                                                                                                 | 68.6±16.7                                                                                                      | <0.001         |
| <b>Male</b>          | 309,043 (53.7)               | 124,614 (59.4)                                                                                             | 184,429 (50.4)                                                                                                 | <0.001         |
| <b>Low income</b>    | 131,093 (22.8)               | 37,359 (17.8)                                                                                              | 93,734 (25.6)                                                                                                  | <0.001         |
| <b>Heart failure</b> | 171,455 (29.8)               | 51,053 (24.3)                                                                                              | 120,402 (32.9)                                                                                                 | <0.001         |
| <b>Prior stroke</b>  | 124,644 (21.6)               | 31,039 (14.8)                                                                                              | 93,605 (25.6)                                                                                                  | <0.001         |
| <b>Prior MI</b>      | 43,699 (7.6)                 | 11,622 (5.5)                                                                                               | 32,077 (8.8)                                                                                                   | <0.001         |
| <b>PAD</b>           | 121,433 (21.1)               | 45,694 (21.8)                                                                                              | 75,739 (20.7)                                                                                                  | <0.001         |
| <b>COPD</b>          | 146,235 (25.4)               | 42,303 (20.2)                                                                                              | 103,932 (28.4)                                                                                                 | <0.001         |
| <b>Cancer</b>        | 59,348 (10.3)                | 12,035 (5.7)                                                                                               | 47,313 (12.9)                                                                                                  | <0.001         |

COPD, chronic obstructive pulmonary disease; MI, myocardial infarction; PAD, peripheral artery disease.
